# Supplementary material for: Epigenome‐Wide Association Study for All‐Cause Mortality in a Cardiovascular Cohort Identifies Differential Methylation in Castor Zinc Finger 1 (CASZ1)
Source: PubMed Central journal article supplement — J Am Heart Assoc. 2019 Oct 23;8(21):e013228. doi: 10.1161/JAHA.119.013228 (PMC6898816; doi:10.1161/jaha.119.013228), 2019-10-23
Supplement: JAH3-8-e013228-s001.pdf [file JAH3-8-e013228-s001.pdf]

# **Supplemental Material**

## Data S1.

### For Gel Electrophoresis scoring:

5 = clearly visible high molecular weight DNA band, no signs of degradation (no smear)

4 = clearly visible high molecular weight DNA band, some possible degradation (smear) but less than 10% of the total DNA

3 = some high molecular weight DNA band, any shift of high molecular weight band, but clearly visible smear

2 = no clear indication of high molecular weight DNA, visible smear the length of gel path

1 = no indication of high molecular weight DNA, all smear, low molecular weight

0 = no visible smear or bands; unusual result (to be repeated after requantification if necessary)

### For PicoGreen protocol:

0. Set samples out to equilibrate at room temperature for a couple hours before starting PicoGreen. Set the standards and PicoGreen solution out 30 minutes beforehand.
1. Add 5  $\mu\text{L}$  of each sample into the 96 well PCR plate (or U-bottom plate if on Biomek.)
2. Add 195  $\mu\text{L}$  of hydration solution to each sample and mix several times.
3. Transfer 8  $\mu\text{L}$  of diluted sample into the clear bottom Picoplate.
4. Add 8  $\mu\text{L}$  of standard into the first column of the Picoplate.
5. PicoGreen solution: Add 53.8  $\mu\text{L}$  of PicoGreen dye to 20.5 mL of hydration solution in a 50 mL conical tube. Mix tube well by inverting.
6. Add 192  $\mu\text{L}$  of PicoGreen mix to Picoplate samples. (Pipet up and down to mix well)

Run on PicoGreen reader.

**PicoGreen Dilution Standards** (use with 500 ng/ $\mu$ L of Lambda DNA)

This is a serial dilution, so only pipet out 42  $\mu$ L of Lambda DNA and add water, before you proceed to the next standard.

|                                                       |                                                                                   |                     |
|-------------------------------------------------------|-----------------------------------------------------------------------------------|---------------------|
| 300 ng = 42 $\mu$ L DNA + 28 $\mu$ L H <sub>2</sub> O |  | 50 $\mu$ L from 300 |
| 250 ng = 50 $\mu$ L DNA + 10 $\mu$ L H <sub>2</sub> O |                                                                                   | 40 $\mu$ L from 250 |
| 200 ng = 40 $\mu$ L DNA + 10 $\mu$ L H <sub>2</sub> O |                                                                                   | 30 $\mu$ L from 200 |
| 150 ng = 30 $\mu$ L DNA + 10 $\mu$ L H <sub>2</sub> O |                                                                                   | 20 $\mu$ L from 150 |
| 100 ng = 20 $\mu$ L DNA + 10 $\mu$ L H <sub>2</sub> O |                                                                                   | 10 $\mu$ L from 100 |
| 50 ng = 10 $\mu$ L DNA + 10 $\mu$ L H <sub>2</sub> O  |                                                                                   |                     |
| 0 ng = 20 $\mu$ L H <sub>2</sub> O                    |                                                                                   |                     |

**Table S1. *Comb-p* DMR meta-analysis results of the discovery and validation sets. DMRs that were statistically significant using an FDR-adjusted p-value <0.05 are shown.**

| Chromosome      | Start     | End       | Number of Probes | FDR-adj p-value | Gene/s              |
|-----------------|-----------|-----------|------------------|-----------------|---------------------|
| 1               | 2344699   | 2345895   | 13               | 1.37E-15        | <i>PEX10</i>        |
| 12              | 124908601 | 124908932 | 6                | 3.19E-12        | <i>NCOR2</i>        |
| 6               | 15504844  | 15506086  | 9                | 1.56E-10        | <i>JARID2</i>       |
| 4               | 89299314  | 89300651  | 9                | 7.83E-10        | <i>HERC6</i>        |
| 3               | 101443264 | 101443993 | 12               | 2.73E-09        | <i>CEP97</i>        |
| 1               | 205818956 | 205819610 | 8                | 1.06E-08        | <i>PM20D1</i>       |
| 7               | 1250038   | 1251339   | 14               | 2.72E-07        | <i>UNCX</i>         |
| 14              | 103415458 | 103416269 | 5                | 2.67E-06        | <i>CDC42BPB</i>     |
| 22              | 24105087  | 24105693  | 5                | 3.43E-06        | <i>C22orf15</i>     |
| 16              | 85676292  | 85676862  | 5                | 3.57E-06        | <i>GSE1</i>         |
| 1               | 6239157   | 6241507   | 10               | 3.80E-06        | <i>CHD5</i>         |
| 5               | 140891767 | 140893635 | 6                | 4.84E-06        | <i>PCDHGA1</i>      |
|                 |           |           |                  |                 | <i>PCDHGA2</i>      |
|                 |           |           |                  |                 | <i>PCDHGA3</i>      |
|                 |           |           |                  |                 | <i>PCDHGB1</i>      |
|                 |           |           |                  |                 | <i>PCDHGA4</i>      |
|                 |           |           |                  |                 | <i>PCDHGB2</i>      |
|                 |           |           |                  |                 | <i>PCDHGA5</i>      |
|                 |           |           |                  |                 | <i>PCDHGB3</i>      |
|                 |           |           |                  |                 | <i>PCDHGA6</i>      |
|                 |           |           |                  |                 | <i>PCDHGA7</i>      |
|                 |           |           |                  |                 | <i>PCDHGB4</i>      |
|                 |           |           |                  |                 | <i>PCDHGA8</i>      |
|                 |           |           |                  |                 | <i>PCDHGB5</i>      |
|                 |           |           |                  |                 | <i>PCDHGA9</i>      |
|                 |           |           |                  |                 | <i>PCDHGB6</i>      |
|                 |           |           |                  |                 | <i>PCDHGA10</i>     |
|                 |           |           |                  |                 | <i>PCDHGB7</i>      |
| <i>PCDHGA11</i> |           |           |                  |                 |                     |
| <i>PCDHGA12</i> |           |           |                  |                 |                     |
| <i>PCDHGC3</i>  |           |           |                  |                 |                     |
| <i>PCDHGC4</i>  |           |           |                  |                 |                     |
| <i>PCDHGC5</i>  |           |           |                  |                 |                     |
| 12              | 10183172  | 10183365  | 5                | 5.41E-06        | <i>CLEC9A</i>       |
| 17              | 72349697  | 72350711  | 5                | 7.40E-06        | <i>KIF19</i>        |
| 21              | 46077454  | 46077732  | 5                | 7.63E-06        | <i>TSPEAR</i>       |
| 17              | 5137892   | 5138697   | 5                | 1.36E-05        | <i>LOC100130950</i> |
|                 |           |           |                  |                 | <i>SCIMP</i>        |
| 10              | 134150451 | 134150761 | 7                | 1.38E-05        | <i>LRRC27</i>       |
| 22              | 17956453  | 17956642  | 5                | 1.58E-05        | <i>CECR2</i>        |

|    |           |           |    |          |                        |
|----|-----------|-----------|----|----------|------------------------|
| 17 | 33759512  | 33760528  | 12 | 2.01E-05 | <i>SLFN12</i>          |
| 11 | 70672388  | 70673257  | 9  | 2.45E-05 | <i>SHANK2</i>          |
| 19 | 3785573   | 3786958   | 8  | 3.07E-05 | <i>MATK</i>            |
| 8  | 21882013  | 21882943  | 8  | 5.66E-05 | <i>NPM2</i>            |
| 13 | 111317935 | 111318641 | 5  | 5.69E-05 | <i>CARS2</i>           |
| 1  | 3823656   | 3824448   | 7  | 5.75E-05 | <i>LOC100133612</i>    |
| 11 | 43333145  | 43333989  | 12 | 6.74E-05 | <i>API5</i>            |
| 13 | 47471705  | 47472430  | 13 | 7.08E-05 | <i>HTR2A</i>           |
| 7  | 11871535  | 11872074  | 9  | 7.09E-05 | <i>THSD7A</i>          |
| 4  | 81117853  | 81119474  | 10 | 7.22E-05 | <i>PRDM8</i>           |
| 22 | 50985681  | 50986963  | 7  | 7.63E-05 | <i>KLHDC7B</i>         |
| 11 | 108408907 | 108409366 | 5  | 1.20E-04 | <i>EXPH5</i>           |
| 12 | 89743788  | 89744878  | 10 | 1.43E-04 | <i>DUSP6</i>           |
| 2  | 239046275 | 239048580 | 11 | 1.46E-04 | <i>KLHL30</i>          |
| 1  | 48175246  | 48177262  | 10 | 1.73E-04 | <i>TRABD2B</i>         |
| 1  | 160951675 | 160952704 | 5  | 2.10E-04 | <i>F11R</i>            |
| 11 | 128736844 | 128737468 | 8  | 2.14E-04 | <i>KCNJ1</i>           |
| 5  | 43040174  | 43042234  | 15 | 2.47E-04 | <i>ANXA2R</i>          |
| 2  | 65593761  | 65594891  | 6  | 2.61E-04 | <i>SPRED2</i>          |
| 2  | 27665079  | 27665712  | 9  | 3.52E-04 | <i>NRBP1</i>           |
|    |           |           |    |          | <i>KRTCAP3</i>         |
| 1  | 1099583   | 1100558   | 8  | 4.22E-04 | <i>MIR200B</i>         |
| 9  | 124981504 | 124983483 | 6  | 4.40E-04 | <i>LHX6</i>            |
| 12 | 96350519  | 96350796  | 5  | 6.03E-04 | <i>AMDHD1</i>          |
| 12 | 85430025  | 85430337  | 8  | 6.64E-04 | <i>TSPAN19</i>         |
|    |           |           |    |          | <i>LRRIQ1</i>          |
| 3  | 146261991 | 146262762 | 6  | 6.74E-04 | <i>PLSCR1</i>          |
| 17 | 7311030   | 7312082   | 9  | 6.83E-04 | <i>NLGN2</i>           |
| 2  | 21266500  | 21267335  | 12 | 7.00E-04 | <i>APOB</i>            |
| 8  | 85094437  | 85096038  | 10 | 7.03E-04 | <i>RALYL</i>           |
| 3  | 127006287 | 127007607 | 6  | 7.09E-04 | <i>PLXNA1</i>          |
| 20 | 3051954   | 3052693   | 11 | 7.33E-04 | <i>OXT</i>             |
| 6  | 41068173  | 41069049  | 7  | 7.67E-04 | <i>NFYA</i>            |
|    |           |           |    |          | <i>ADCY10P1</i>        |
| 3  | 158390329 | 158390822 | 10 | 7.73E-04 | <i>GFM1</i>            |
|    |           |           |    |          | <i>LXN</i>             |
| 17 | 6916926   | 6917615   | 5  | 8.05E-04 | <i>RNASEK-C17orf49</i> |
|    |           |           |    |          | <i>RNASEK</i>          |
| 12 | 6745057   | 6745569   | 6  | 8.15E-04 | <i>LPAR5</i>           |
| 4  | 46391159  | 46391930  | 13 | 8.30E-04 | <i>GABRA2</i>          |
| 12 | 79257496  | 79258856  | 12 | 9.98E-04 | <i>SYT1</i>            |
| 1  | 1149091   | 1150417   | 6  | 0.001232 | <i>TNFRSF4</i>         |
| 11 | 65314913  | 65315626  | 6  | 0.001277 | <i>LTBP3</i>           |
| 3  | 164913627 | 164915016 | 12 | 0.001839 | <i>SLITRK3</i>         |
| 19 | 59024873  | 59026418  | 7  | 0.001879 | <i>ZBTB45</i>          |

|    |           |           |    |          |                     |
|----|-----------|-----------|----|----------|---------------------|
| 5  | 2225011   | 2225483   | 5  | 0.001993 | <i>IRX4</i>         |
| 8  | 144511672 | 144513981 | 10 | 0.002425 | <i>MAFA</i>         |
| 11 | 68924577  | 68925192  | 6  | 0.003025 | <i>TPCN2</i>        |
| 1  | 120173989 | 120174874 | 6  | 0.003207 | <i>ZNF697</i>       |
| 2  | 208988863 | 208989832 | 7  | 0.003266 | <i>LOC100507443</i> |
|    |           |           |    |          | <i>CRYGD</i>        |
| 1  | 28843736  | 28844753  | 8  | 0.003337 | <i>RCC1</i>         |
| 1  | 66257822  | 66258442  | 5  | 0.003819 | <i>PDE4B</i>        |
| 6  | 155537595 | 155538156 | 7  | 0.003869 | <i>TIAM2</i>        |
| 6  | 158588763 | 158589858 | 16 | 0.003979 | <i>SERAC1</i>       |
|    |           |           |    |          | <i>GTF2H5</i>       |
| 2  | 45159663  | 45160555  | 9  | 0.003993 | <i>SIX3</i>         |
| 1  | 156783633 | 156785559 | 10 | 0.004154 | <i>SH2D2A</i>       |
|    |           |           |    |          | <i>NTRK1</i>        |
| 5  | 126408756 | 126409554 | 13 | 0.004389 | <i>C5orf63</i>      |
| 11 | 13983705  | 13984044  | 9  | 0.004722 | <i>SPON1</i>        |
| 5  | 77139964  | 77140986  | 7  | 0.005066 | <i>TBCA</i>         |
| 12 | 6438317   | 6439098   | 6  | 0.005205 | <i>TNFRSF1A</i>     |
| 22 | 45608345  | 45609422  | 13 | 0.005308 | <i>KIAA0930</i>     |
| 12 | 69632957  | 69634188  | 10 | 0.006195 | <i>CPSF6</i>        |
| 19 | 1008643   | 1010237   | 8  | 0.006392 | <i>GRIN3B</i>       |
|    |           |           |    |          | <i>C19orf6</i>      |
| 3  | 113160071 | 113160822 | 10 | 0.006828 | <i>WDR52</i>        |
| 17 | 7253720   | 7255462   | 6  | 0.007723 | <i>ACAP1</i>        |
|    |           |           |    |          | <i>KCTD11</i>       |
| 7  | 38350921  | 38351469  | 6  | 0.008525 | <i>LOC100506776</i> |
| 6  | 30610729  | 30611057  | 6  | 0.009719 | <i>ATAT1</i>        |
| 6  | 792256    | 792779    | 6  | 0.009784 | <i>EXOC2</i>        |
| 22 | 19949585  | 19950167  | 8  | 0.01023  | <i>COMT</i>         |
| 6  | 28828946  | 28829947  | 21 | 0.01077  | <i>LOC401242</i>    |
| 6  | 29454623  | 29455533  | 13 | 0.0116   | <i>MAS1L</i>        |
| 17 | 46668715  | 46669567  | 8  | 0.01174  | <i>HOXB-AS3</i>     |
|    |           |           |    |          | <i>HOXB5</i>        |
| 8  | 1900191   | 1900893   | 6  | 0.01216  | <i>ARHGEF10</i>     |
| 13 | 53422381  | 53424128  | 15 | 0.01275  | <i>PCDH8</i>        |
| 10 | 123355268 | 123356337 | 9  | 0.01321  | <i>FGFR2</i>        |
| 17 | 76037035  | 76037563  | 6  | 0.01371  | <i>TNRC6C</i>       |
| 5  | 50673033  | 50675115  | 12 | 0.01401  | <i>LOC642366</i>    |
| 2  | 108993602 | 108994529 | 9  | 0.01423  | <i>SULT1C4</i>      |
| 7  | 149157735 | 149158487 | 8  | 0.01503  | <i>ZNF777</i>       |
| 11 | 68781976  | 68782212  | 5  | 0.01516  | <i>MRGPRF</i>       |
| 6  | 55038900  | 55039623  | 6  | 0.01605  | <i>HCRTR2</i>       |
| 1  | 854766    | 856060    | 12 | 0.01639  | <i>LOC100130417</i> |
| 8  | 37605359  | 37605979  | 7  | 0.0164   | <i>ERLIN2</i>       |
|    |           |           |    |          | <i>LOC728024</i>    |

|    |           |           |    |         |                  |
|----|-----------|-----------|----|---------|------------------|
| 8  | 1896437   | 1897076   | 5  | 0.01722 | <i>ARHGEF10</i>  |
| 16 | 89723193  | 89725270  | 10 | 0.01888 | <i>CHMP1A</i>    |
|    |           |           |    |         | <i>C16orf55</i>  |
| 6  | 503773    | 504352    | 5  | 0.019   | <i>EXOC2</i>     |
| 5  | 54281198  | 54281734  | 7  | 0.01991 | <i>ESM1</i>      |
| 19 | 14591033  | 14591346  | 5  | 0.02    | <i>GIPC1</i>     |
| 6  | 41605343  | 41606870  | 7  | 0.0203  | <i>MDFI</i>      |
| 11 | 10715175  | 10715768  | 11 | 0.02117 | <i>MRV11</i>     |
| 19 | 16186840  | 16187103  | 5  | 0.0212  | <i>TPM4</i>      |
| 1  | 220132091 | 220132729 | 6  | 0.02139 | <i>RNU5F-1</i>   |
| 4  | 81106414  | 81107186  | 7  | 0.02301 | <i>PRDM8</i>     |
| 11 | 35965104  | 35966323  | 7  | 0.02373 | <i>LDLRAD3</i>   |
| 13 | 46961583  | 46961898  | 10 | 0.02431 | <i>KIAA0226L</i> |
| 3  | 32432942  | 32434340  | 6  | 0.02502 | <i>CMTM7</i>     |
| 1  | 27189270  | 27189680  | 5  | 0.02694 | <i>SFN</i>       |
| 22 | 33196103  | 33197035  | 6  | 0.02797 | <i>SYN3</i>      |
|    |           |           |    |         | <i>TIMP3</i>     |
| 12 | 51566379  | 51567113  | 10 | 0.02873 | <i>TFCP2</i>     |
| 6  | 166580460 | 166581273 | 5  | 0.03009 | <i>T</i>         |
| 14 | 105995251 | 105996514 | 6  | 0.03101 | <i>TMEM121</i>   |
| 20 | 19866743  | 19867146  | 8  | 0.03132 | <i>RIN2</i>      |
| 17 | 3438857   | 3439373   | 6  | 0.03149 | <i>TRPV3</i>     |
| 2  | 241496830 | 241497664 | 9  | 0.03216 | <i>ANKMY1</i>    |
| 6  | 76203225  | 76203676  | 7  | 0.03355 | <i>FILIP1</i>    |
| 16 | 604802    | 605726    | 7  | 0.03396 | <i>SOLH</i>      |
| 11 | 69462660  | 69463324  | 5  | 0.03402 | <i>CCND1</i>     |
| 2  | 233284661 | 233285930 | 5  | 0.03569 | <i>ALPPL2</i>    |
| 19 | 51225848  | 51226850  | 7  | 0.03614 | <i>CLEC11A</i>   |
| 3  | 87039536  | 87040740  | 12 | 0.03757 | <i>VGLL3</i>     |
| 11 | 1750302   | 1750764   | 5  | 0.03785 | <i>MOB2</i>      |
| 2  | 163695776 | 163696188 | 6  | 0.03893 | <i>KCNH7</i>     |
| 11 | 1989715   | 1991876   | 10 | 0.0394  | <i>MRPL23</i>    |
| 12 | 1025529   | 1026393   | 7  | 0.04056 | <i>RAD52</i>     |
| 15 | 31515750  | 31516482  | 9  | 0.04338 | <i>LOC283710</i> |
| 16 | 685580    | 686585    | 7  | 0.04369 | <i>C16orf13</i>  |
| 19 | 44808796  | 44809320  | 8  | 0.04643 | <i>ZNF235</i>    |
| 14 | 105166740 | 105167974 | 8  | 0.04817 | <i>INF2</i>      |
| 2  | 74647579  | 74649150  | 10 | 0.04883 | <i>WDR54</i>     |
| 1  | 156465749 | 156467189 | 5  | 0.04986 | <i>MEF2D</i>     |

**Table S2. Probes with nominal p-value<0.05 found in both discovery and validation cohorts that are common to previous EWAS of all-cause mortality.**

| Probe                              | Nominal p-value (Discovery) | FDR-adj p (Discovery) | $\Delta\beta$ | Nominal p-value (Validation) | FDR-adj p (Discovery) | $\Delta\beta$ | Direction of methylation in respective article* |
|------------------------------------|-----------------------------|-----------------------|---------------|------------------------------|-----------------------|---------------|-------------------------------------------------|
| ESTHER/KORA Study (PMID: 28303888) |                             |                       |               |                              |                       |               |                                                 |
| cg14975410                         | 0.015                       | 0.713                 | -3.009        | 0.049                        | 0.816                 | -3.950        | -                                               |
| cg23842572                         | 0.027                       | 0.742                 | -3.435        | 0.006                        | 0.745                 | -2.367        | +                                               |
| cg18181703                         | 0.020                       | 0.727                 | -3.233        | 0.027                        | 0.796                 | -3.488        | -                                               |
| Twin Study (PMID: 29419728)        |                             |                       |               |                              |                       |               |                                                 |
| cg15763258                         | 0.003                       | 0.658                 | -1.804        | 0.026                        | 0.793                 | -3.463        | Not specified                                   |

\*Direction of methylation: when negative (-) methylation was lower in cases than in controls and when positive (+)

methylation was higher in cases than controls.
